# Supplementary material
Source: ML conference proceedings conference paper supplement (https://openreview.net/forum?id=FUnM3xTKfg)
Supplement: supplementary_material [file attachment]

# Supplementary Material: Multimodal LLM Enhanced Cross-lingual Cross-modal Retrieval

Anonymous Author(s)

## ACM Reference Format:

Anonymous Author(s). 2024. *Supplementary Material: Multimodal LLM Enhanced Cross-lingual Cross-modal Retrieval*. In *MM '24: Proceedings of the 32th ACM International Conference on Multimedia*, October 10–14, 2024, Lisbon, Portugal. ACM, New York, NY, USA, 2 pages. <https://doi.org/10.1145/nnnnnnn.nnnnnnn>

We report more experimental results and technical details which are not included in the paper due to space limit:

- Analysis of the parameter  $\lambda$  (Section 1).
- Analysis of the parameter  $\beta$  (Section 2).

## 1 PARAMETER $\lambda$

As shown in Figure 1, we conduct an experiment to investigate the impact of the parameter  $\lambda$ , which balances the weight between English guidance loss and vision-non-English contrastive loss. When  $\lambda = 0.0$ , it indicates that we only use the English guidance loss. We can observe that the performance is best when we set the  $\lambda$  to

0.5. This result demonstrates the complementarity between English guidance loss and contrastive loss, enabling the model to learn comprehensive and robust inter-modal correspondence by incorporating English guidance.

## 2 PARAMETER $\beta$

The parameter  $\beta$  is used to control the weights of global similarities  $S_g$  and local similarities  $S_l$  during inference. Among them, global similarities  $S_g$  are calculated by global visual features and query features, and local similarities  $S_l$  are calculated by local semantic contexts and query features. To further investigate the influence of the parameter  $\beta$  during inference, we conduct an ablation study. As shown in Figure 2, we observe that incorporating the similarity score  $S_l$  leads to additional performance improvement. This can be attributed to the fact that the similarity score  $S_l$  can provide the local correspondence between modalities, which is complementary to the global similarity scores  $S_g$ . The performance is best when  $\beta = 0.8$ , and we set it to 0.8 in our experiments.

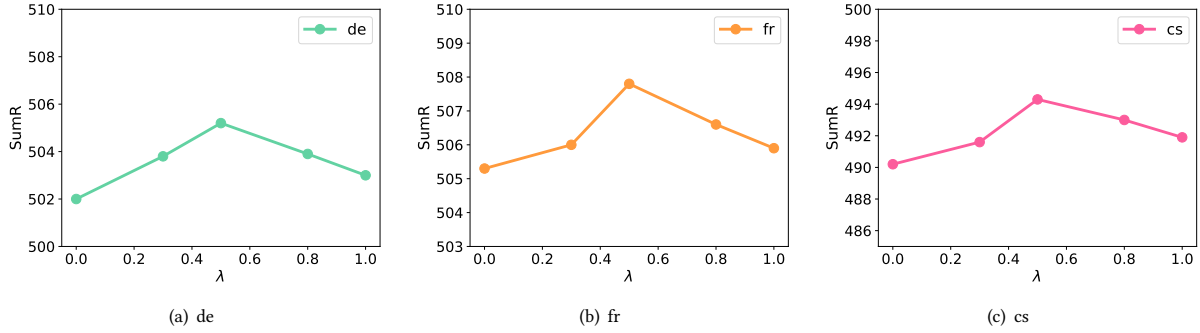

Figure 1: The performance of different values of  $\lambda$ .

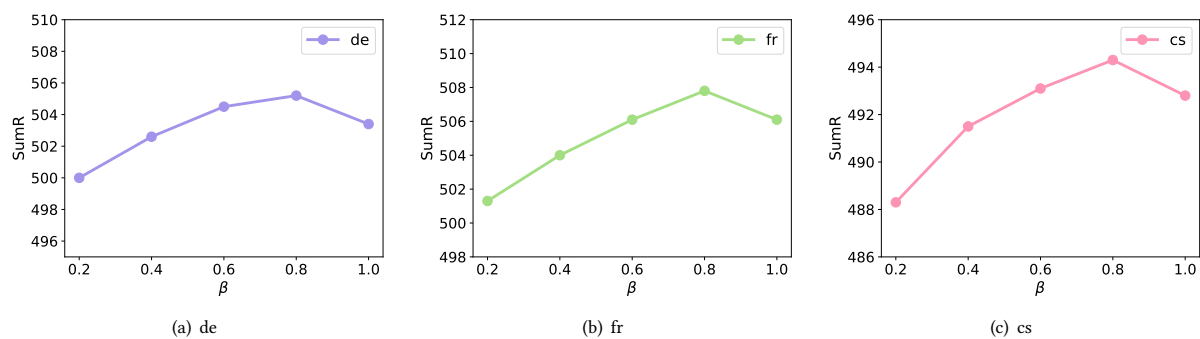

Figure 2: The performance of different values of  $\beta$ .
